# Supplementary material for: Architectural integration of the components necessary for electrical energy storage on the nanoscale and in 3D
Source: Royal Society of Chemistry journal article supplement (doi:10.1039/c0nr00731e), 2011-01-01
Supplement: c0nr00731e.pdf [file c0nr00731e.pdf]

Cite this: 10.1039/c0nr00731e

SUPPLEMENTARY INFORMATION

www.rsc.org/Nanoscale

## Architectural integration of the components necessary for electrical energy storage on the nanoscale and in three dimensions

Christopher P. Rhodes,<sup>†a</sup> Jeffrey W. Long,<sup>\*a</sup> Katherine A. Pettigrew,<sup>‡a</sup> Rhonda M. Stroud<sup>b</sup> and Debra R. Rolison<sup>\*a</sup>

5

Received 29th September 2010, Accepted 15th January 2011

DOI: 10.1039/c0nr00731e

### Supplementary Information

10

#### X-ray photoelectron spectroscopy

X-ray photoelectron spectroscopic measurements were taken on a Surface Science Instrument Model SSX-100-03 using an Al K $\alpha$  X-ray source.

15 The survey spectra were obtained using a single scan with a step size of 1 eV; higher resolution spectra were obtained by averaging 10 scans, each taken with a step size of 0.1 eV. The energies of the XPS peaks were referenced to the C 1s binding energy for adventitious carbon at 284.6 eV. The curve-fitted spectra of the Ru 3d<sub>5/2</sub> region of (a) RuO<sub>x</sub>H<sub>y</sub>,  
20 (b) ITO||PPO||RuO<sub>x</sub>H<sub>y</sub>, and (c) ITO||MnO<sub>2</sub>||PPO||RuO<sub>x</sub>H<sub>y</sub> are shown in Fig. S1. The data are further discussed in the main text.

25

30

35

Fig. S1 The curve-fitted X-ray photoelectron spectra of the Ru 3d<sub>5/2</sub> region of (a) RuO<sub>x</sub>H<sub>y</sub>, (b) ITO||PPO||RuO<sub>x</sub>H<sub>y</sub>, and (c) MnO<sub>x</sub>||PPO||RuO<sub>x</sub>H<sub>y</sub>.

40

45

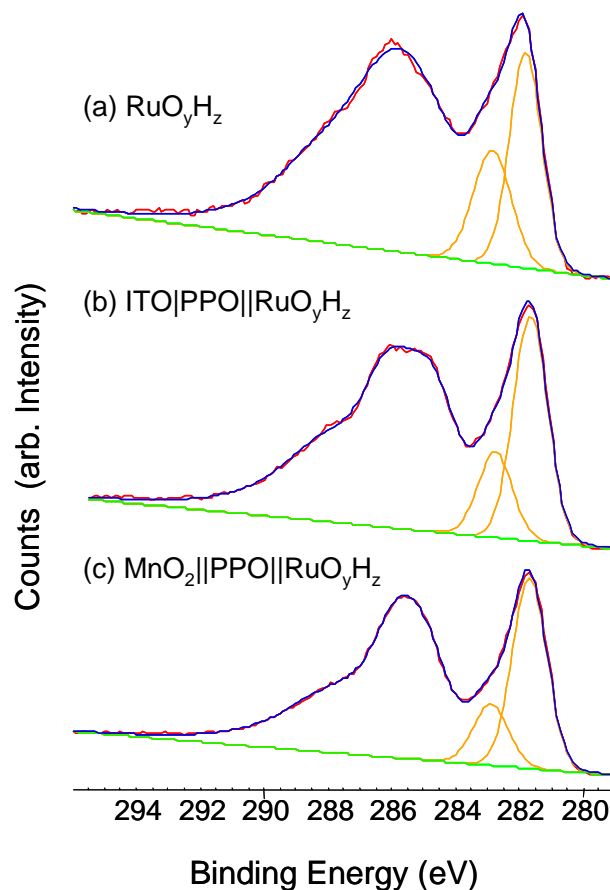

<sup>a</sup> US Naval Research Laboratory, Surface Chemistry Branch (Code 6170), 4555 Overlook Avenue SW, Washington, DC, 20375, USA. E-mail: jeffrey.long@nrl.navy.mil; rolison@nrl.navy.mil; Fax: +1-202-767-3321

50 <sup>b</sup> US Naval Research Laboratory, Materials and Sensors Branch (Code 6360) 4555 Overlook Avenue SW, Washington, DC, 20375, USA

<sup>†</sup> Lynntech, Inc., 2501 Rudder Freeway S., College Station, TX 77845, USA

<sup>‡</sup> Department of Chemistry, George Mason University, Fairfax, VA 22030, USA

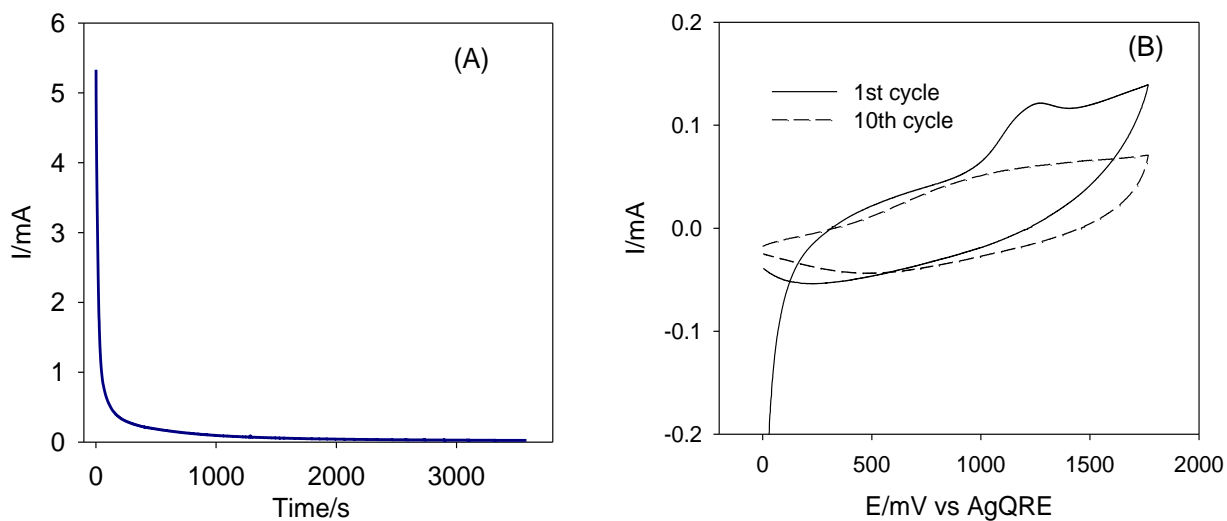

**Fig. S2** Deposition of polymer at ITO||MnO<sub>x</sub> (working electrode) in monomer solution consisting of 50 mM phenol, 50 mM Me<sub>4</sub>NOH, 0.1 M Bu<sub>4</sub>NClO<sub>4</sub> in CH<sub>3</sub>CN (Pt gauze counter electrode; AgQRE reference electrode); (A) Chronoamperometry data for potentiostatic step (1767 mV vs. Ag QRE for 1 h); (B) selected cycles from subsequent potential-sweep deposition (767 mV to 1767 mV vs. Ag QRE, 10 mV s<sup>-1</sup>, 10 cycles).

10

## Acknowledgements

Financial support for this work was provided by the US Office of Naval Research and the Office of the Secretary of Defense ONR–MURI Program on 3D Architectures for Future Electrochemical Power Sources (2001–2006). C. P. R. was an ONR–MURI postdoctoral associate (2002–2005); K. A. P. was an NRC–NRL postdoctoral associate (2004–2007).
